# Supplementary material for: Dynamic control of chirality and self-assembly of double-stranded helicates with light
Source: Springer Nature journal article supplement (doi:10.1038/nchem.2668), 2016-11-07
Supplement: 41557_2017_BFnchem2668_MOESM13_ESM.mol [file 41557_2017_BFnchem2668_MOESM13_ESM.mol]

nchem.2668-compRRPPtransL1.mol
  ChemDraw10061611513D

 58 65  0  0  1  0  0  0  0  0999 V2000
   -4.3217    1.1949   -0.0550 C   0  0  0  0  0  0  0  0  0  0  0  0
   -4.3217    2.7179   -0.0550 C   0  0  0  0  0  0  0  0  0  0  0  0
   -3.0027    3.4794   -0.0550 C   0  0  0  0  0  0  0  0  0  0  0  0
   -1.6838    2.7179   -0.0550 C   0  0  0  0  0  0  0  0  0  0  0  0
   -1.6838    1.1949   -0.0550 C   0  0  0  0  0  0  0  0  0  0  0  0
   -3.0027    0.4334   -0.0550 C   0  0  0  0  0  0  0  0  0  0  0  0
   -0.2353    3.1885   -0.0550 C   0  0  0  0  0  0  0  0  0  0  0  0
    0.6599    1.9564   -0.0550 C   0  0  0  0  0  0  0  0  0  0  0  0
   -0.2353    0.7242   -0.0550 C   0  0  0  0  0  0  0  0  0  0  0  0
   -3.0027   -1.0896   -0.0550 C   0  0  0  0  0  0  0  0  0  0  0  0
   -3.0027    5.0024   -0.0550 C   0  0  0  0  0  0  0  0  0  0  0  0
   -5.6406    0.4334   -0.0550 C   0  0  0  0  0  0  0  0  0  0  0  0
    4.3217   -1.1949   -0.0550 C   0  0  0  0  0  0  0  0  0  0  0  0
    4.3217   -2.7179   -0.0550 C   0  0  0  0  0  0  0  0  0  0  0  0
    3.0027   -3.4794   -0.0550 C   0  0  0  0  0  0  0  0  0  0  0  0
    1.6838   -2.7179   -0.0550 C   0  0  0  0  0  0  0  0  0  0  0  0
    1.6838   -1.1949   -0.0550 C   0  0  0  0  0  0  0  0  0  0  0  0
    3.0027   -0.4334   -0.0550 C   0  0  0  0  0  0  0  0  0  0  0  0
    0.2353   -3.1885   -0.0550 C   0  0  0  0  0  0  0  0  0  0  0  0
   -0.6599   -1.9564   -0.0550 C   0  0  0  0  0  0  0  0  0  0  0  0
    0.2353   -0.7242   -0.0550 C   0  0  0  0  0  0  0  0  0  0  0  0
    3.0027    1.0896   -0.0550 C   0  0  0  0  0  0  0  0  0  0  0  0
    3.0027   -5.0024   -0.0550 C   0  0  0  0  0  0  0  0  0  0  0  0
    5.6406   -0.4334   -0.0550 C   0  0  0  0  0  0  0  0  0  0  0  0
   -2.1829   -1.9564   -0.0550 C   0  0  0  0  0  0  0  0  0  0  0  0
    2.1829    1.9564   -0.0550 C   0  0  0  0  0  0  0  0  0  0  0  0
   -5.6406   -1.0896   -0.0550 O   0  0  0  0  0  0  0  0  0  0  0  0
   -6.9596    1.1949   -0.0550 N   0  0  0  0  0  0  0  0  0  0  0  0
    5.6406    1.0896   -0.0550 O   0  0  0  0  0  0  0  0  0  0  0  0
   -8.2786    0.4334   -0.0550 C   0  0  0  0  0  0  0  0  0  0  0  0
   -9.5975    1.1949   -0.0550 C   0  0  0  0  0  0  0  0  0  0  0  0
   -9.5975    2.7179   -0.0550 C   0  0  0  0  0  0  0  0  0  0  0  0
  -10.9165    3.4794   -0.0550 C   0  0  0  0  0  0  0  0  0  0  0  0
  -12.2354    2.7179   -0.0550 C   0  0  0  0  0  0  0  0  0  0  0  0
  -12.2354    1.1949   -0.0550 C   0  0  0  0  0  0  0  0  0  0  0  0
  -10.9165    0.4334   -0.0550 N   0  0  0  0  0  0  0  0  0  0  0  0
  -13.5544    0.4334   -0.0550 C   0  0  0  0  0  0  0  0  0  0  0  0
  -14.8612    1.1739   -0.1651 C   0  0  0  0  0  0  0  0  0  0  0  0
  -16.1802    0.4124   -0.1651 C   0  0  0  0  0  0  0  0  0  0  0  0
  -16.1923   -1.0896   -0.0550 C   0  0  0  0  0  0  0  0  0  0  0  0
  -14.8855   -1.8301    0.0550 C   0  0  0  0  0  0  0  0  0  0  0  0
  -13.5665   -1.0686    0.0550 N   0  0  0  0  0  0  0  0  0  0  0  0
  -14.8976   -3.3321    0.1651 C   0  0  0  0  0  0  0  0  0  0  0  0
    6.9596   -1.1949   -0.0550 N   0  0  0  0  0  0  0  0  0  0  0  0
    8.2786   -0.4334   -0.0550 C   0  0  0  0  0  0  0  0  0  0  0  0
    9.5975   -1.1949   -0.0550 C   0  0  0  0  0  0  0  0  0  0  0  0
    9.5975   -2.7179   -0.0550 C   0  0  0  0  0  0  0  0  0  0  0  0
   10.9165   -3.4794   -0.0550 C   0  0  0  0  0  0  0  0  0  0  0  0
   12.2354   -2.7179   -0.0550 C   0  0  0  0  0  0  0  0  0  0  0  0
   12.2354   -1.1949   -0.0550 C   0  0  0  0  0  0  0  0  0  0  0  0
   10.9165   -0.4334   -0.0550 N   0  0  0  0  0  0  0  0  0  0  0  0
   13.5544   -0.4334   -0.0550 C   0  0  0  0  0  0  0  0  0  0  0  0
   14.8712   -1.1911   -0.1019 C   0  0  0  0  0  0  0  0  0  0  0  0
   16.1901   -0.4296   -0.1019 C   0  0  0  0  0  0  0  0  0  0  0  0
   16.1923    1.0896   -0.0550 C   0  0  0  0  0  0  0  0  0  0  0  0
   14.8755    1.8474   -0.0082 C   0  0  0  0  0  0  0  0  0  0  0  0
   13.5566    1.0859   -0.0082 N   0  0  0  0  0  0  0  0  0  0  0  0
   14.8777    3.3666    0.0386 C   0  0  0  0  0  0  0  0  0  0  0  0
  1  2  2  0      
  2  3  1  0      
  3  4  2  0      
  4  5  1  0      
  5  6  2  0      
  6  1  1  0      
  4  7  1  0      
  7  8  1  0      
  8  9  1  0      
  9  5  1  0      
  6 10  1  0      
  3 11  1  0      
  1 12  1  0      
 13 14  2  0      
 14 15  1  0      
 15 16  2  0      
 16 17  1  0      
 17 18  2  0      
 18 13  1  0      
 16 19  1  0      
 19 20  1  0      
 20 21  1  0      
 21 17  1  0      
 18 22  1  0      
 15 23  1  0      
 13 24  1  0      
  9 21  2  0      
 20 25  1  1      
  8 26  1  1      
 12 27  2  0      
 12 28  1  0      
 24 29  2  0      
 28 30  1  0      
 30 31  1  0      
 31 32  2  0      
 32 33  1  0      
 33 34  2  0      
 34 35  1  0      
 35 36  2  0      
 36 31  1  0      
 35 37  1  0      
 37 38  2  0      
 38 39  1  0      
 39 40  2  0      
 40 41  1  0      
 41 42  2  0      
 42 37  1  0      
 41 43  1  0      
 44 45  1  0      
 45 46  1  0      
 46 47  2  0      
 47 48  1  0      
 48 49  2  0      
 49 50  1  0      
 50 51  2  0      
 51 46  1  0      
 50 52  1  0      
 52 53  2  0      
 53 54  1  0      
 54 55  2  0      
 55 56  1  0      
 56 57  2  0      
 57 52  1  0      
 56 58  1  0      
 24 44  1  0      
M  END
